# Supplementary material for: CAG peptide functionalized graphene quantum dots-cationic polymer composite gene carriers
Source: Royal Society of Chemistry journal article supplement (doi:10.1039/d4tb00322e), 2024-01-01
Supplement: d4tb00322e1.pdf [file d4tb00322e1.pdf]

Marker (Thermo Fisher, 26616, China)

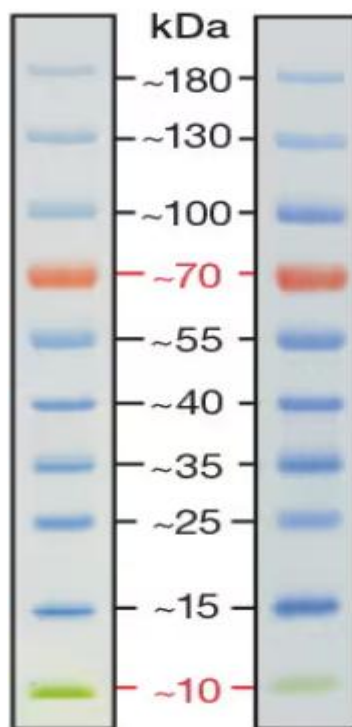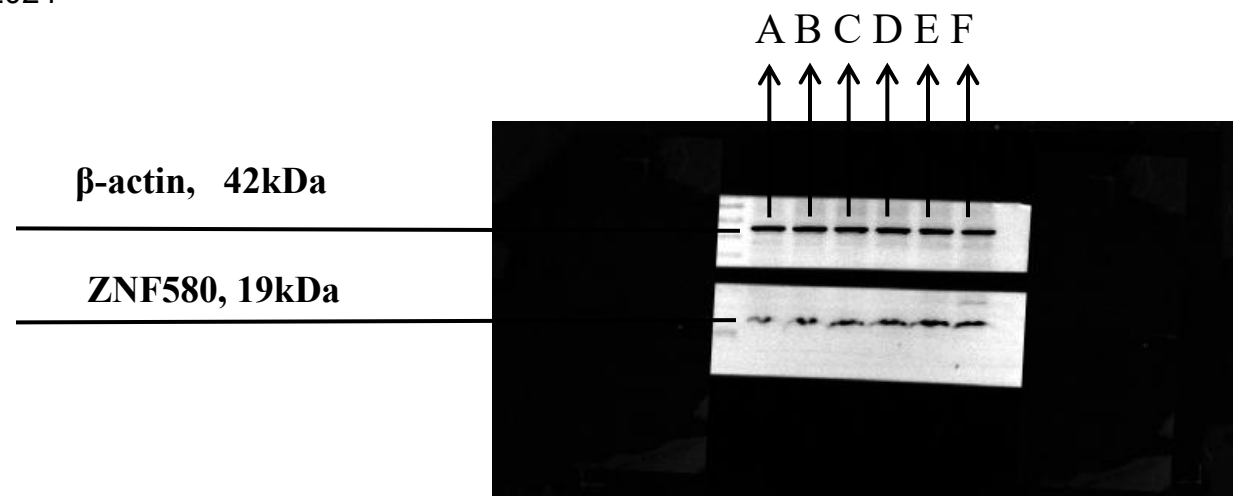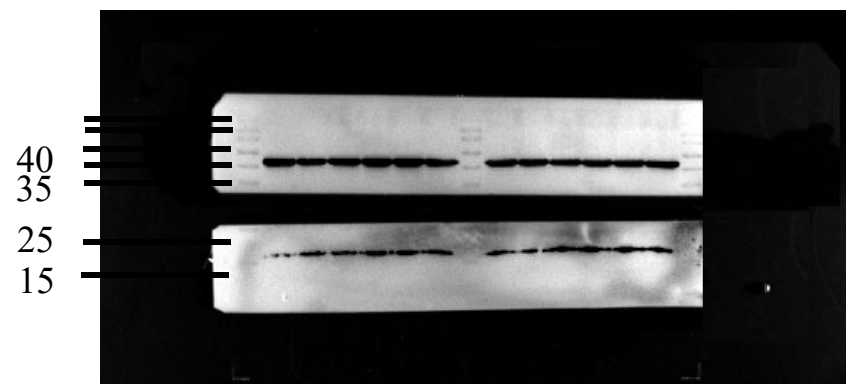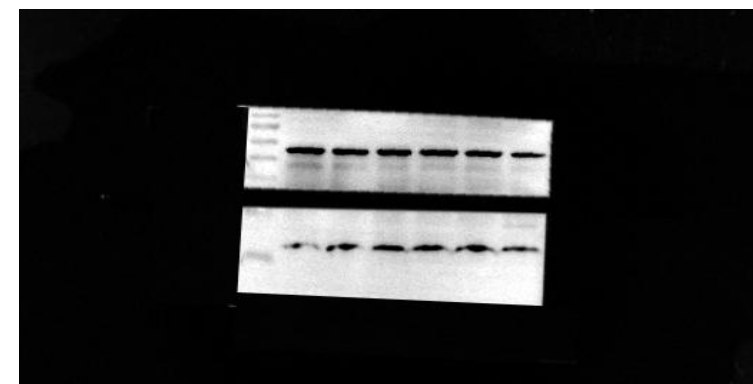

(A)pZNF580、(B)A-GQDs-PEG-CAG/pZNF580、(C)C-GQDs-PEI-PEG-CAG/pZNF580、(D)C-GQDs-PEI-PLGA-PEG-CAG/pZNF580、(E)N-GQDs-PEI-PLGA-PEG-CAG/pZNF580、(F)Lip2000/pZNF580
